# Supplementary material
Source: PubMed Central journal article supplement (PMC10527805)
Supplement: NIHMS1912505-supplement-1.pdf [file NIHMS1912505-supplement-1.pdf]

764 **Appendix**  
765

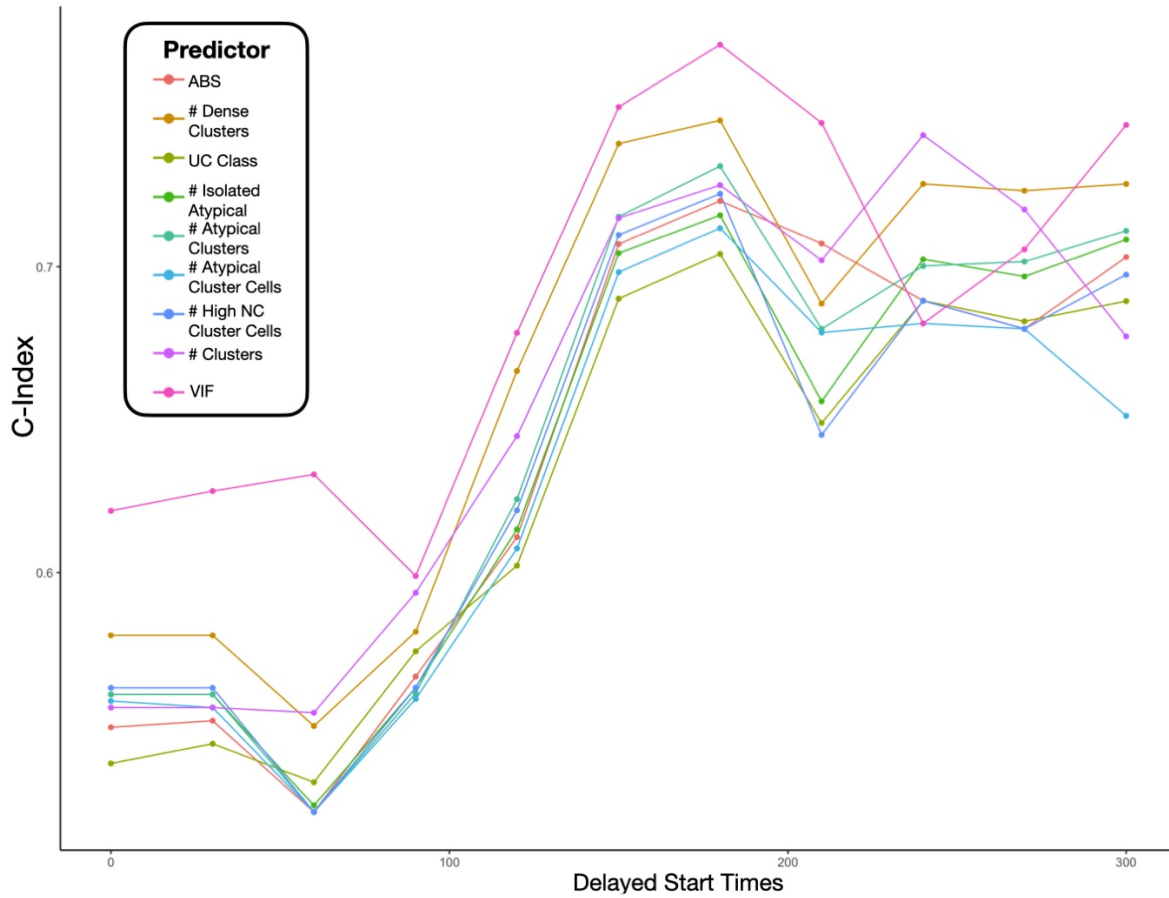

766 **Supplementary Figure 1: C-index for specific imaging / manual cytology exam results,**  
767 **reported based on different collection periods/times (days) prior to the recurrence risk follow-up**  
768 **period; only select AutoParis-X measurements of interest were reported**  
769  
770

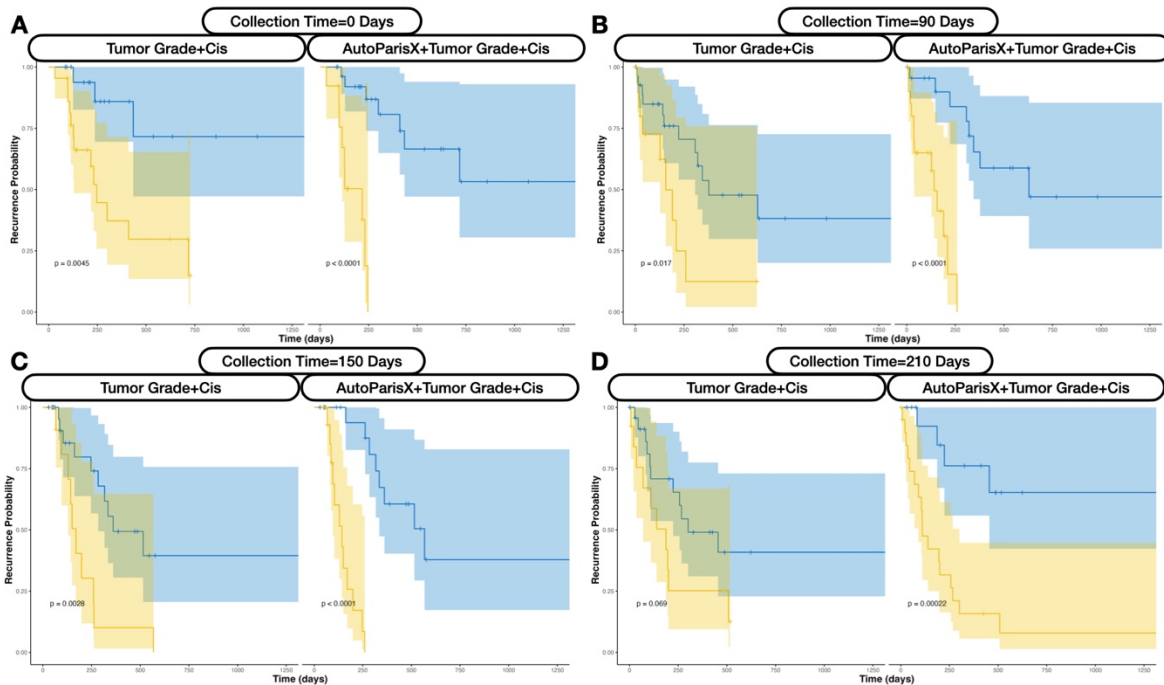

771  
772 **Supplementary Figure 2: Comparison of KM plots for Imaging versus Histological**  
773 **Predictors, for cytological information collected across the following collection time periods**  
774 **after the first positive primary: A) 0 days, B) 90 days, C) 150 days, D) 210 days**  
775

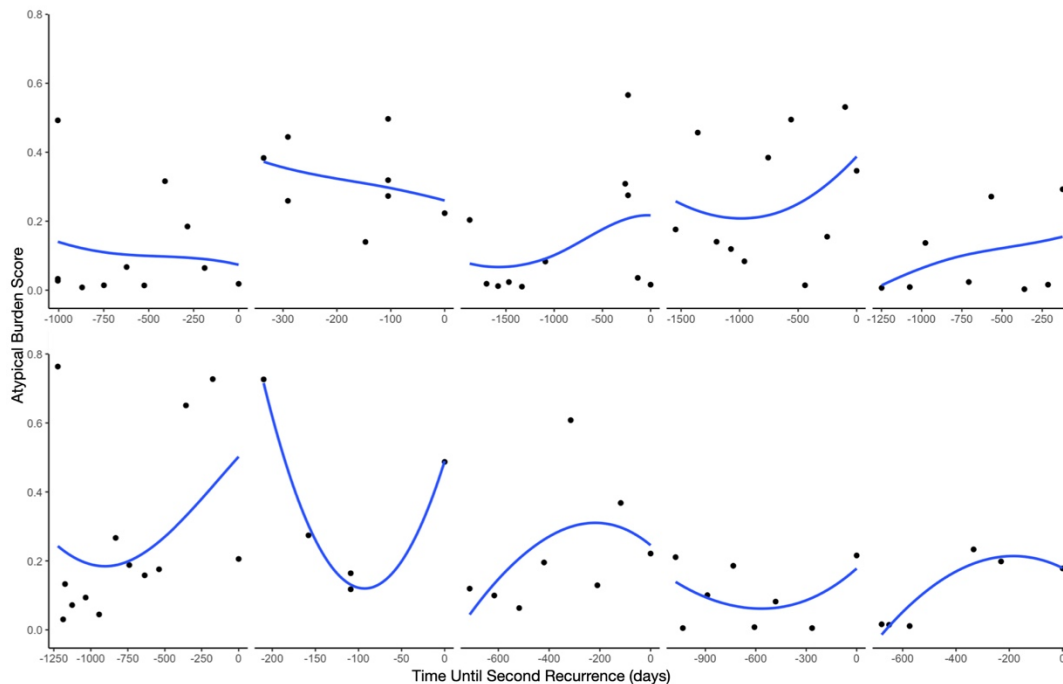

776  
777 **Supplementary Figure 3: Atypia Burden Score Versus Time Until Second Recurrence:**  
778 **Reported for 10 patients with at least 4 repeat exams across the period between their first and**  
779 **second recurrence**  
780

781

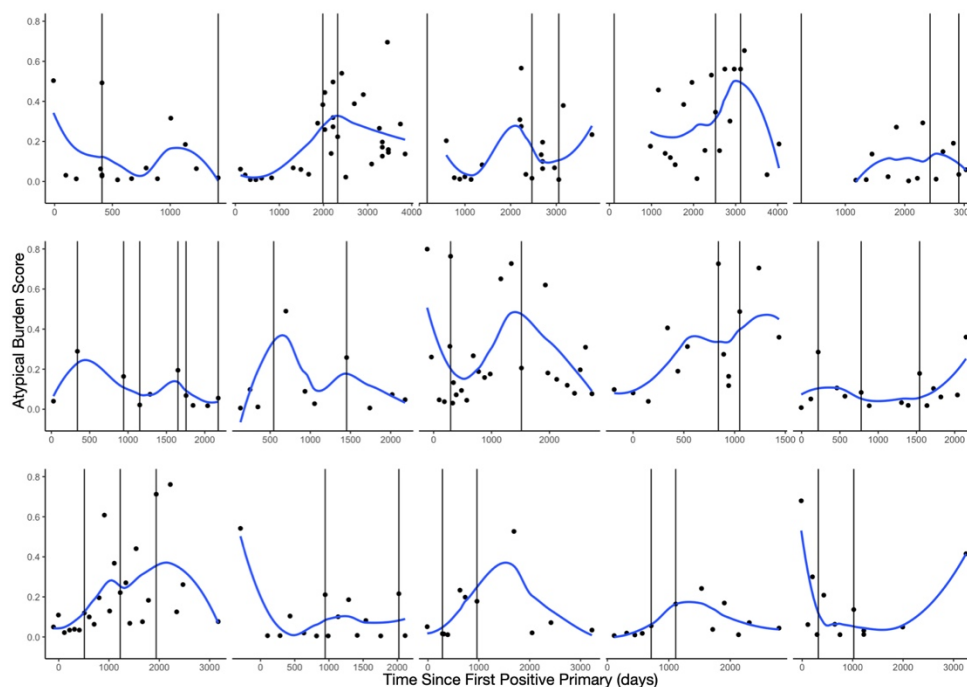

782

783

**Supplementary Figure 4: Atypia Burden Score Versus Time Across Multiple Recurrence Events for Select Patients:** Each recurrence date is represented with the vertical line

784

785

786

787

**Supplementary Table 1: Description of Slide Level predictors of Recurrence**

| Level   | Predictor                                       | Algorithm                      | Description                                                                                                                                                                                                                                                                                           |
|---------|-------------------------------------------------|--------------------------------|-------------------------------------------------------------------------------------------------------------------------------------------------------------------------------------------------------------------------------------------------------------------------------------------------------|
| Cell    | Urothelial cell score                           | UroNet                         | Predicted probability of urothelial cell from convolutional neural network, used to dynamically isolate urothelial cells in specimen                                                                                                                                                                  |
|         | Atypia score                                    | AtyNet                         | Predicted probability of presence of atypical features in urothelial cell (e.g., hyperchromasia, irregular nuclear membrane, etc.), determined using convolutional neural network                                                                                                                     |
|         | NC Ratio                                        | UroSeg                         | Nuclear to cytoplasm area ratio derived from pixelwise segmentation of nucleus and cytoplasm using segmentation neural network                                                                                                                                                                        |
|         | Morphometric measures                           | Custom                         | Complements binning of urothelial cells and assignment of atypia score, features: 1) area; 2) convex area; 3) eccentricity; 4) equivalent diameter; 5) extent; 6) Feret's diameter; 7) maximum diameter; 8) filled area; 9) major axis length; 10) minor axis length; 11) perimeter; and 12) solidity |
| Cluster | Dense Area                                      | BorderDet                      | Whether cluster contains dense architecture of overlapping and indistinguishable cytoplasmic borders                                                                                                                                                                                                  |
|         | Number urothelial cells                         | BorderDet/UroNet               | Whether cluster contained urothelial cells, determined by counting cells with high urothelial cell score                                                                                                                                                                                              |
|         | Number atypical urothelial cells (atypia score) | BorderDet/UroNet/AtyNet        | Whether cluster contained abnormal urothelial cells, determined by counting cells with high atypia score                                                                                                                                                                                              |
|         | Number atypical urothelial cells (NC ratio)     | BorderDet/UroNet/UroSeg        | Whether cluster contained abnormal urothelial cells, determined by counting cells with high NC ratio                                                                                                                                                                                                  |
|         | Dense & Atypical                                | BorderDet/UroNet/AtyNet/UroSeg | Whether cluster contained both dense architecture and atypical cellular features                                                                                                                                                                                                                      |

| Slide | Patient characteristics  | Supplied                       | Includes age, sex, history of hematuria, specimen source (e.g., voided), presence of specimen artifact                                                                                                                            |
|-------|--------------------------|--------------------------------|-----------------------------------------------------------------------------------------------------------------------------------------------------------------------------------------------------------------------------------|
|       | Isolated Cell-SIF Scores | Bayesian Optimization          | Counting the number of cells with the following features from cells not associated with clusters: 1) cellularity (urothelial score), 2) atypia (atypia score), 3) atypia (NC ratio), 4) other morphometric measures               |
|       | Cluster Cell-SIF Scores  | Bayesian Optimization          | Counting the number of cells with the following features from cells associated with clusters: 1) cellularity (urothelial score), 2) atypia (atypia score), 3) atypia (NC ratio), 4) other morphometric measures                   |
|       | All Cell-SIF Scores      | Bayesian Optimization          | Combines Isolated Cell-SIF Scores and Cluster Cell-SIF Scores                                                                                                                                                                     |
|       | Cluster-SIF              | Bayesian Optimization          | Counting the number of clusters with the following features: 1) number of urothelial clusters, 2) atypical urothelial clusters (atypia score), 3) atypical clusters (NC ratio), 4) dense clusters, 5) dense and atypical clusters |
|       | Atypia Burden Score      | Mixed effects machine learning | Integrates all slide-level predictors using machine learning model to calculate a score between 0-1 reflecting overall specimen atypia, correlated with UC diagnostic category                                                    |

788  
789  
790  
791  
792  
793  
794

**Supplemental Table 2:** Concordance statistics for *fixed predictors* at the following collection time periods; also included are performance statistics for *dynamic predictors* from the *time-varying covariate* cox model; the percentage of imaging variables which outperform manual examination is represented as “% Outperform UC Class”

| Collection Time (days)    | 0     |       | 30    |       | 60    |       | 90    |       | 120   |       | 150   |       |
|---------------------------|-------|-------|-------|-------|-------|-------|-------|-------|-------|-------|-------|-------|
| Predictors                | C     | SE    |
| ABS                       | 0.549 | 0.075 | 0.552 | 0.075 | 0.522 | 0.076 | 0.566 | 0.06  | 0.615 | 0.065 | 0.707 | 0.047 |
| # Dense Clusters          | 0.62  | 0.069 | 0.62  | 0.069 | 0.6   | 0.069 | 0.581 | 0.061 | 0.666 | 0.066 | 0.74  | 0.051 |
| UC Class                  | 0.544 | 0.081 | 0.548 | 0.08  | 0.536 | 0.079 | 0.575 | 0.059 | 0.614 | 0.058 | 0.701 | 0.065 |
| Eccentricity              | 0.558 | 0.084 | 0.564 | 0.088 | 0.515 | 0.078 | 0.557 | 0.059 | 0.662 | 0.059 | 0.716 | 0.048 |
| # Isolated Atypical Cells | 0.56  | 0.077 | 0.56  | 0.077 | 0.524 | 0.077 | 0.562 | 0.059 | 0.615 | 0.064 | 0.704 | 0.042 |
| # Atypical Clusters       | 0.56  | 0.076 | 0.56  | 0.076 | 0.522 | 0.078 | 0.563 | 0.06  | 0.626 | 0.065 | 0.716 | 0.054 |
| # Overall Atypical Cells  | 0.562 | 0.079 | 0.56  | 0.077 | 0.524 | 0.076 | 0.565 | 0.059 | 0.623 | 0.063 | 0.701 | 0.047 |
| # Cluster Atypical Cells  | 0.558 | 0.076 | 0.556 | 0.075 | 0.522 | 0.076 | 0.561 | 0.059 | 0.623 | 0.062 | 0.698 | 0.047 |
| % Clusters Dense/Atypical | 0.554 | 0.076 | 0.554 | 0.076 | 0.519 | 0.077 | 0.564 | 0.06  | 0.631 | 0.051 | 0.683 | 0.054 |
| # Isolated Cells High NC  | 0.558 | 0.081 | 0.558 | 0.081 | 0.522 | 0.076 | 0.564 | 0.058 | 0.617 | 0.063 | 0.713 | 0.047 |
| # Overall Cells High NC   | 0.56  | 0.08  | 0.56  | 0.08  | 0.526 | 0.077 | 0.566 | 0.059 | 0.616 | 0.063 | 0.713 | 0.047 |
| # Cluster Cells High NC   | 0.562 | 0.077 | 0.562 | 0.077 | 0.522 | 0.08  | 0.562 | 0.059 | 0.62  | 0.062 | 0.71  | 0.046 |
| LASSO                     | 0.59  | 0.084 | 0.603 | 0.073 | 0.578 | 0.069 | 0.584 | 0.06  | 0.654 | 0.058 | 0.74  | 0.051 |
| # Cells                   | 0.558 | 0.08  | 0.558 | 0.08  | 0.524 | 0.078 | 0.573 | 0.065 | 0.628 | 0.065 | 0.71  | 0.048 |
| # Clusters                | 0.567 | 0.073 | 0.571 | 0.072 | 0.582 | 0.07  | 0.593 | 0.061 | 0.645 | 0.067 | 0.716 | 0.05  |
| Overall                   | 0.672 | 0.073 | 0.725 | 0.055 | 0.714 | 0.056 | 0.707 | 0.061 | 0.81  | 0.074 | 0.824 | 0.045 |
| VIF                       | 0.62  | 0.073 | 0.627 | 0.071 | 0.632 | 0.066 | 0.614 | 0.055 | 0.7   | 0.051 | 0.752 | 0.058 |
| % Outperform UC Class     | 1.000 | 0.000 | 1.000 | 0.000 | 0.278 | 0.106 | 0.278 | 0.106 | 1.000 | 0.000 | 0.889 | 0.074 |

  

| Collection Time (days) | 180   |       | 210   |       | 240   |       | 270   |       | 300   |       | Time Varying Covariates |       |
|------------------------|-------|-------|-------|-------|-------|-------|-------|-------|-------|-------|-------------------------|-------|
| Predictors             | C     | SE    | C                       | SE    |
| ABS                    | 0.722 | 0.048 | 0.708 | 0.051 | 0.689 | 0.063 | 0.68  | 0.067 | 0.703 | 0.06  | 0.652                   | 0.039 |
| # Dense Clusters       | 0.748 | 0.05  | 0.688 | 0.058 | 0.727 | 0.057 | 0.725 | 0.055 | 0.727 | 0.066 | 0.603                   | 0.038 |
| UC Class               | 0.724 | 0.062 | 0.673 | 0.063 | 0.689 | 0.06  | 0.682 | 0.059 | 0.689 | 0.059 | 0.579                   | 0.05  |
| Eccentricity           | 0.724 | 0.048 | 0.697 | 0.059 | 0.665 | 0.073 | 0.639 | 0.076 | 0.699 | 0.068 | 0.607                   | 0.034 |

|                           |       |       |       |       |       |       |       |       |       |       |       |       |
|---------------------------|-------|-------|-------|-------|-------|-------|-------|-------|-------|-------|-------|-------|
| # Isolated Atypical Cells | 0.717 | 0.043 | 0.692 | 0.056 | 0.702 | 0.065 | 0.697 | 0.066 | 0.709 | 0.061 | 0.612 | 0.039 |
| # Atypical Clusters       | 0.733 | 0.053 | 0.716 | 0.062 | 0.7   | 0.067 | 0.702 | 0.064 | 0.712 | 0.06  | 0.62  | 0.039 |
| # Overall Atypical Cells  | 0.715 | 0.048 | 0.679 | 0.062 | 0.685 | 0.069 | 0.682 | 0.068 | 0.663 | 0.067 | 0.638 | 0.04  |
| # Cluster Atypical Cells  | 0.713 | 0.048 | 0.681 | 0.064 | 0.685 | 0.069 | 0.68  | 0.069 | 0.651 | 0.068 | 0.637 | 0.042 |
| % Clusters Dense/Atypical | 0.701 | 0.055 | 0.695 | 0.066 | 0.641 | 0.069 | 0.649 | 0.072 | 0.669 | 0.071 | 0.588 | 0.041 |
| # Isolated Cells High NC  | 0.724 | 0.046 | 0.664 | 0.061 | 0.709 | 0.066 | 0.69  | 0.066 | 0.689 | 0.063 | 0.588 | 0.039 |
| # Overall Cells High NC   | 0.727 | 0.047 | 0.655 | 0.054 | 0.707 | 0.066 | 0.685 | 0.065 | 0.709 | 0.062 | 0.564 | 0.042 |
| # Cluster Cells High NC   | 0.724 | 0.047 | 0.645 | 0.057 | 0.697 | 0.068 | 0.68  | 0.066 | 0.699 | 0.068 | 0.541 | 0.044 |
| LASSO                     | 0.734 | 0.056 | 0.723 | 0.054 | 0.707 | 0.061 | 0.691 | 0.051 | 0.726 | 0.064 | 0.657 | 0.038 |
| # Cells                   | 0.724 | 0.045 | 0.705 | 0.052 | 0.707 | 0.058 | 0.692 | 0.063 | 0.712 | 0.059 | 0.631 | 0.039 |
| # Clusters                | 0.727 | 0.049 | 0.702 | 0.053 | 0.743 | 0.051 | 0.719 | 0.056 | 0.677 | 0.067 | 0.6   | 0.039 |
| Overall                   | 0.827 | 0.046 | 0.849 | 0.051 | 0.927 | 0.035 | 0.92  | 0.036 | 0.911 | 0.03  | 0.659 | 0.041 |
| VIF                       | 0.773 | 0.058 | 0.747 | 0.057 | 0.731 | 0.061 | 0.743 | 0.074 | 0.746 | 0.06  | 0.682 | 0.036 |
| % Outperform UC Class     | 0.611 | 0.115 | 0.722 | 0.106 | 0.667 | 0.111 | 0.611 | 0.115 | 0.667 | 0.111 | 0.778 | 0.098 |

795  
796  
797  
798  
799  
800  
801

**Supplemental Table 3: Comparison between Cytological Imaging Predictors Versus Histology:** Hazard ratios, 95% confidence intervals and p-values, specifically after adjusting for tumor grade/type, reported for a variable constructed from the imaging predictors alone; also includes p-values from partial likelihood ratio test assessing whether imaging cytological exams improves on histological predictors; reports for *fixed predictors* collected across various collection time periods

| Collection Time (days) | log(HR) | 2.5% CI | 97.5% CI | p-value | p-value- H1: Imaging>Grade+Cis | p-value- H1: Imaging+Grade+Cis>Grade+Cis |
|------------------------|---------|---------|----------|---------|--------------------------------|------------------------------------------|
| 0                      | 1.258   | 0.569   | 1.947    | 0.00035 | 0.220                          | 0.048                                    |
| 30                     | 1.199   | 0.533   | 1.865    | 0.00042 | 0.220                          | 0.054                                    |
| 60                     | 0.980   | 0.429   | 1.531    | 0.00049 | 0.060                          | 0.042                                    |
| 90                     | 0.982   | 0.319   | 1.646    | 0.00370 | 0.144                          | 0.130                                    |
| 120                    | 1.003   | 0.519   | 1.488    | 0.00005 | 0.115                          | 0.102                                    |
| 150                    | 1.019   | 0.538   | 1.499    | 0.00003 | 0.055                          | 0.059                                    |
| 180                    | 1.051   | 0.563   | 1.539    | 0.00002 | 0.060                          | 0.060                                    |
| 210                    | 1.081   | 0.542   | 1.621    | 0.00009 | 0.026                          | 0.028                                    |
| 240                    | 0.962   | 0.455   | 1.470    | 0.00020 | 0.024                          | 0.017                                    |
| 270                    | 0.974   | 0.517   | 1.432    | 0.00003 | 0.020                          | 0.022                                    |
| 300                    | 1.021   | 0.452   | 1.589    | 0.00044 | 0.016                          | 0.017                                    |

802  
803  
804  
805

**Supplementary Table 4: C-indices for Imaging Predictors from Time-Varying Effects Models**

| Predictor        | C     | SE    |
|------------------|-------|-------|
| ABS              | 0.65  | 0.039 |
| Age              | 0.614 | 0.046 |
| # Dense Clusters | 0.578 | 0.037 |
| UC Class         | 0.616 | 0.047 |
| Eccentricity     | 0.563 | 0.049 |
| Sex              | 0.54  | 0.041 |

|                           |       |       |
|---------------------------|-------|-------|
| # Isolated Atypical Cells | 0.554 | 0.042 |
| # Atypical Clusters       | 0.572 | 0.041 |
| # Overall Atypical Cells  | 0.599 | 0.043 |
| % Clusters Dense/Atypical | 0.568 | 0.043 |
| # Isolated Cells High NC  | 0.558 | 0.039 |
| # Overall Cells High NC   | 0.557 | 0.04  |
| # Cells                   | 0.603 | 0.044 |
| # Clusters                | 0.627 | 0.042 |
| Overall                   | 0.728 | 0.043 |

806  
807  
808  
809  
810

**Supplementary Table 5: Hazard Ratios for Imaging Predictors from Time Varying Effects Models;** Predictor effect size and significance is reported for every half year, which was used as the time periods to assess recurrence risk

| Predictor                 | Time    | log(HR)   | 2.5% CI   | 97.5% CI  | z         | Pr(> z ) |
|---------------------------|---------|-----------|-----------|-----------|-----------|----------|
| # Overall Atypical Cells  | 0-180   | 1.39E-04  | 8.58E-05  | 1.93E-04  | 1.77E+00  | 7.63E-02 |
|                           | 180-360 | 3.08E-04  | 1.90E-04  | 4.26E-04  | 1.51E+00  | 1.32E-01 |
|                           | 360-540 | 4.60E-04  | 3.12E-04  | 6.07E-04  | 1.50E+00  | 1.33E-01 |
|                           | 540-720 | 7.25E-04  | 1.53E-04  | 1.30E-03  | 6.43E-01  | 5.20E-01 |
|                           | 720-900 | -6.14E-04 | -1.84E-03 | 6.08E-04  | -6.91E-01 | 4.89E-01 |
|                           | >900    | 1.38E-03  | 8.03E-04  | 1.95E-03  | 1.10E+00  | 2.69E-01 |
| # Overall Cells High NC   | 0-180   | 2.03E-04  | -2.87E-05 | 4.35E-04  | 6.93E-01  | 4.89E-01 |
|                           | 180-360 | 8.75E-04  | 4.99E-04  | 1.25E-03  | 2.35E+00  | 1.89E-02 |
|                           | 360-540 | 1.52E-03  | 9.92E-04  | 2.05E-03  | 1.29E+00  | 1.98E-01 |
|                           | 540-720 | 1.09E-03  | -1.20E-04 | 2.30E-03  | 5.60E-01  | 5.75E-01 |
|                           | 720-900 | -5.97E-05 | -2.13E-03 | 2.01E-03  | -3.43E-02 | 9.73E-01 |
|                           | >900    | 8.15E-03  | 6.09E-03  | 1.02E-02  | 3.97E+00  | 7.23E-05 |
| # Cells                   | 0-180   | 4.72E-05  | 3.32E-05  | 6.11E-05  | 1.73E+00  | 8.39E-02 |
|                           | 180-360 | 5.16E-05  | 3.65E-05  | 6.66E-05  | 1.65E+00  | 9.90E-02 |
|                           | 360-540 | -4.94E-06 | -3.29E-05 | 2.31E-05  | -1.32E-01 | 8.95E-01 |
|                           | 540-720 | 7.06E-05  | 4.95E-05  | 9.17E-05  | 2.49E+00  | 1.28E-02 |
|                           | 720-900 | -1.07E-04 | -2.38E-04 | 2.33E-05  | -1.41E+00 | 1.58E-01 |
|                           | >900    | 2.03E-04  | 1.43E-04  | 2.63E-04  | 1.58E+00  | 1.14E-01 |
| Eccentricity              | 0-180   | 4.30E+00  | 1.89E+00  | 6.70E+00  | 8.73E-01  | 3.83E-01 |
|                           | 180-360 | -1.60E+00 | -3.89E+00 | 6.87E-01  | -5.49E-01 | 5.83E-01 |
|                           | 360-540 | 3.97E+00  | 4.59E-01  | 7.47E+00  | 4.50E-01  | 6.53E-01 |
|                           | 540-720 | 1.72E+01  | 1.12E+01  | 2.31E+01  | 1.15E+00  | 2.49E-01 |
|                           | 720-900 | 6.20E+00  | -2.94E+00 | 1.53E+01  | 3.73E-01  | 7.09E-01 |
|                           | >900    | 5.72E+00  | -1.11E+00 | 1.25E+01  | 4.22E-01  | 6.73E-01 |
| # Isolated Atypical Cells | 0-180   | 1.21E-04  | -1.75E-04 | 4.17E-04  | 3.89E-01  | 6.98E-01 |
|                           | 180-360 | 4.85E-04  | 1.04E-04  | 8.67E-04  | 8.19E-01  | 4.13E-01 |
|                           | 360-540 | 2.02E-03  | 1.60E-03  | 2.44E-03  | 3.47E+00  | 5.22E-04 |
|                           | 540-720 | 1.15E-04  | -2.23E-03 | 2.46E-03  | 2.37E-02  | 9.81E-01 |
|                           | 720-900 | -4.80E-03 | -9.49E-03 | -1.21E-04 | -7.92E-01 | 4.29E-01 |
|                           | >900    | 2.19E-03  | 1.24E-04  | 4.25E-03  | 5.51E-01  | 5.82E-01 |
| # Isolated Cells High NC  | 0-180   | 3.20E-04  | -3.19E-04 | 9.60E-04  | 3.78E-01  | 7.05E-01 |
|                           | 180-360 | 2.70E-03  | 1.86E-03  | 3.54E-03  | 3.79E+00  | 1.51E-04 |
|                           | 360-540 | 2.33E-03  | 1.48E-03  | 3.18E-03  | 1.19E+00  | 2.34E-01 |
|                           | 540-720 | 4.15E-03  | 2.00E-03  | 6.30E-03  | 1.24E+00  | 2.13E-01 |
|                           | 720-900 | -2.49E-03 | -7.73E-03 | 2.75E-03  | -6.05E-01 | 5.45E-01 |
|                           | >900    | 1.43E-02  | 1.09E-02  | 1.77E-02  | 2.95E+00  | 3.15E-03 |
| # Dense Clusters          | 0-180   | 2.85E-04  | -5.81E-04 | 1.15E-03  | 2.38E-01  | 8.12E-01 |
|                           | 180-360 | 2.08E-03  | 1.54E-03  | 2.61E-03  | 4.87E+00  | 1.12E-06 |
|                           | 360-540 | 9.12E-03  | 7.59E-03  | 1.06E-02  | 4.20E+00  | 2.64E-05 |
|                           | 540-720 | -1.02E-02 | -1.91E-02 | -1.20E-03 | -9.38E-01 | 3.48E-01 |
|                           | 720-900 | -4.12E-03 | -1.39E-02 | 5.63E-03  | -3.27E-01 | 7.44E-01 |
|                           | >900    | -3.12E-03 | -1.12E-02 | 4.96E-03  | -2.68E-01 | 7.89E-01 |

|                                  |         |           |           |           |           |          |
|----------------------------------|---------|-----------|-----------|-----------|-----------|----------|
| <b># Clusters</b>                | 0-180   | 8.60E-05  | 5.55E-05  | 1.16E-04  | 1.56E+00  | 1.20E-01 |
|                                  | 180-360 | 1.39E-04  | 1.10E-04  | 1.69E-04  | 3.66E+00  | 2.50E-04 |
|                                  | 360-540 | 4.19E-05  | -9.12E-06 | 9.29E-05  | 4.55E-01  | 6.49E-01 |
|                                  | 540-720 | 4.93E-05  | -1.16E-05 | 1.10E-04  | 4.64E-01  | 6.43E-01 |
|                                  | 720-900 | -5.40E-04 | -8.79E-04 | -2.02E-04 | -1.85E+00 | 6.48E-02 |
|                                  | >900    | 5.93E-05  | -2.11E-05 | 1.40E-04  | 3.87E-01  | 6.99E-01 |
| <b>% Clusters Dense/Atypical</b> | 0-180   | 8.25E+00  | 5.08E+00  | 1.14E+01  | 1.93E+00  | 5.30E-02 |
|                                  | 180-360 | 5.06E+00  | -2.06E+00 | 1.22E+01  | 3.65E-01  | 7.15E-01 |
|                                  | 360-540 | 2.56E+01  | 1.99E+01  | 3.14E+01  | 2.64E+00  | 8.39E-03 |
|                                  | 540-720 | -2.20E+01 | -4.32E+01 | -7.23E-01 | -6.85E-01 | 4.93E-01 |
|                                  | 720-900 | 3.74E+01  | 2.15E+01  | 5.34E+01  | 1.67E+00  | 9.44E-02 |
|                                  | >900    | 2.29E+01  | 7.72E+00  | 3.81E+01  | 1.02E+00  | 3.07E-01 |
| <b># Atypical Clusters</b>       | 0-180   | 7.07E-04  | 2.25E-04  | 1.19E-03  | 1.39E+00  | 1.65E-01 |
|                                  | 180-360 | 2.89E-03  | 1.76E-03  | 4.02E-03  | 1.53E+00  | 1.26E-01 |
|                                  | 360-540 | 3.58E-03  | 2.71E-03  | 4.45E-03  | 2.12E+00  | 3.40E-02 |
|                                  | 540-720 | 3.22E-03  | -5.21E-04 | 6.96E-03  | 3.99E-01  | 6.90E-01 |
|                                  | 720-900 | -6.12E-03 | -1.40E-02 | 1.74E-03  | -5.87E-01 | 5.57E-01 |
|                                  | >900    | 4.81E-03  | 9.55E-04  | 8.67E-03  | 6.08E-01  | 5.43E-01 |
| <b>ABS</b>                       | 0-180   | 2.74E+00  | 2.17E+00  | 3.31E+00  | 3.00E+00  | 2.69E-03 |
|                                  | 180-360 | 2.22E+00  | 1.57E+00  | 2.86E+00  | 1.72E+00  | 8.51E-02 |
|                                  | 360-540 | -1.86E-01 | -1.22E+00 | 8.45E-01  | -1.30E-01 | 8.96E-01 |
|                                  | 540-720 | 8.28E-01  | -5.97E-01 | 2.25E+00  | 2.75E-01  | 7.84E-01 |
|                                  | 720-900 | 2.39E+00  | 6.42E-01  | 4.15E+00  | 9.43E-01  | 3.46E-01 |
|                                  | >900    | 7.96E+00  | 6.45E+00  | 9.47E+00  | 3.31E+00  | 9.41E-04 |
| <b>UC Class</b>                  | 0-180   | 1.61E+00  | 1.35E+00  | 1.88E+00  | 3.10E+00  | 1.96E-03 |
|                                  | 180-360 | 8.31E-01  | 5.37E-01  | 1.13E+00  | 1.38E+00  | 1.68E-01 |
|                                  | 360-540 | -2.07E-01 | -7.32E-01 | 3.19E-01  | -2.03E-01 | 8.39E-01 |
|                                  | 540-720 | 4.70E-01  | -7.19E-02 | 1.01E+00  | 4.38E-01  | 6.61E-01 |
|                                  | 720-900 | 1.29E+00  | 6.80E-01  | 1.91E+00  | 1.39E+00  | 1.64E-01 |
|                                  | >900    | 1.49E+00  | 1.00E+00  | 1.98E+00  | 1.55E+00  | 1.21E-01 |

811  
 812 **Supplementary Table 6: Results from beta regression models comparing recurrence risk to**  
 813 **ABS scores during distinct time periods; Coefficients B** represents differences in ABS scores  
 814 between low and high risk patients at specific time periods; the final coefficient represents how  
 815 ABS scores are changing over time between the first and second recurrences  
 816

| Comparison                                                          | Time Period                      | B      | 2.5% CI | 97.5% CI | p-value |
|---------------------------------------------------------------------|----------------------------------|--------|---------|----------|---------|
| <b>High vs low risk, days since positive primary</b>                | <b>0-113</b>                     | -0.297 | -1.169  | 0.575    | 0.506   |
|                                                                     | <b>114-204</b>                   | 0.134  | -1.212  | 1.479    | 0.846   |
|                                                                     | <b>205-295</b>                   | -0.806 | -1.849  | 0.238    | 0.133   |
|                                                                     | <b>295-412</b>                   | -1.038 | -1.888  | -0.187   | 0.019   |
|                                                                     | <b>413-690</b>                   | -1.186 | -1.957  | -0.416   | 0.003   |
| <b>High vs low risk, days until first recurrence</b>                | <b>&gt;752</b>                   | -0.070 | -0.645  | 0.505    | 0.812   |
|                                                                     | <b>752-391</b>                   | 0.122  | -0.438  | 0.683    | 0.669   |
|                                                                     | <b>390-227</b>                   | -0.496 | -1.086  | 0.095    | 0.102   |
|                                                                     | <b>226-114</b>                   | 0.093  | -0.459  | 0.645    | 0.742   |
|                                                                     | <b>113-0</b>                     | -0.595 | -1.193  | 0.003    | 0.053   |
| <b>Days until second recurrence, starting from first recurrence</b> | <b>Time in days (continuous)</b> | 0.001  | 0.000   | 0.001    | 0.018   |

817  
 818
